# Supplementary material for: Resolving the dilemma of gaining conductivity but losing environmental friendliness in producing polystyrene/graphene composites via optimizing the matrix-filler structure
Source: Royal Society of Chemistry journal article supplement (doi:10.1039/c3gc37042a), 2013-01-01
Supplement: c3gc37042a.pdf [file c3gc37042a.pdf]

## Supporting information

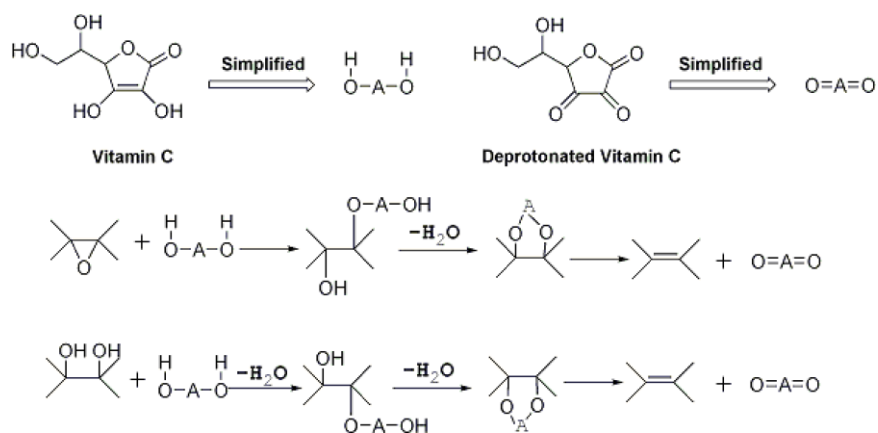

Scheme 1S. Schematic illustration of chemical reaction pathway of graphene oxide (GO) reduced by Vitamin C.

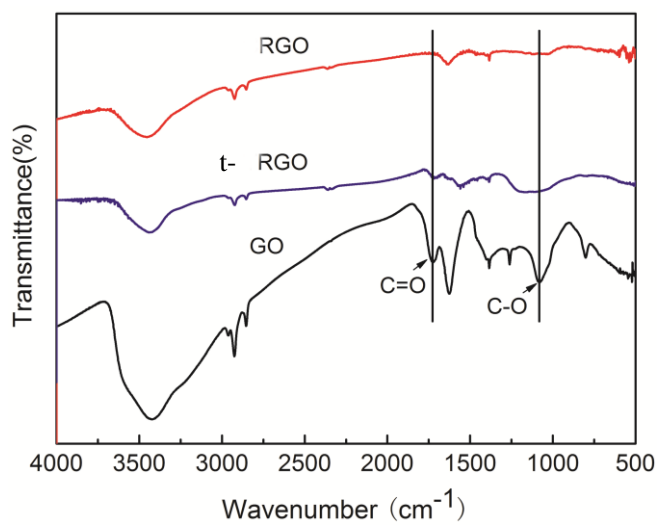

Figure 1S. FTIR spectra of GO, t-RGO, and RGO.

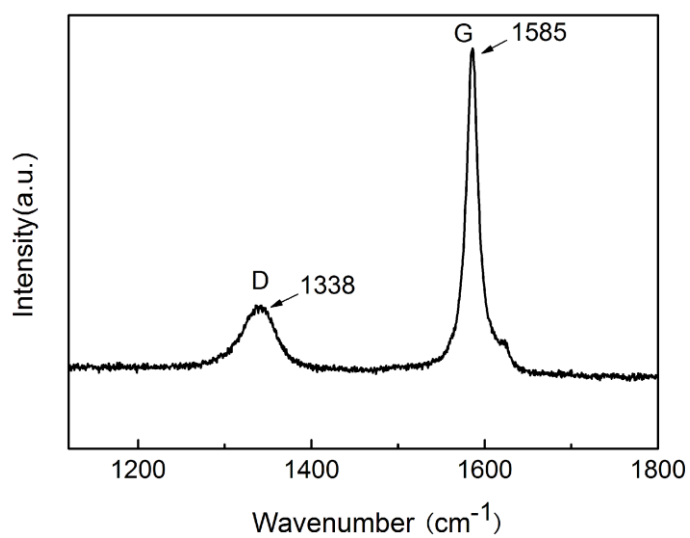

Figure 2S. The Raman spectrum of graphite

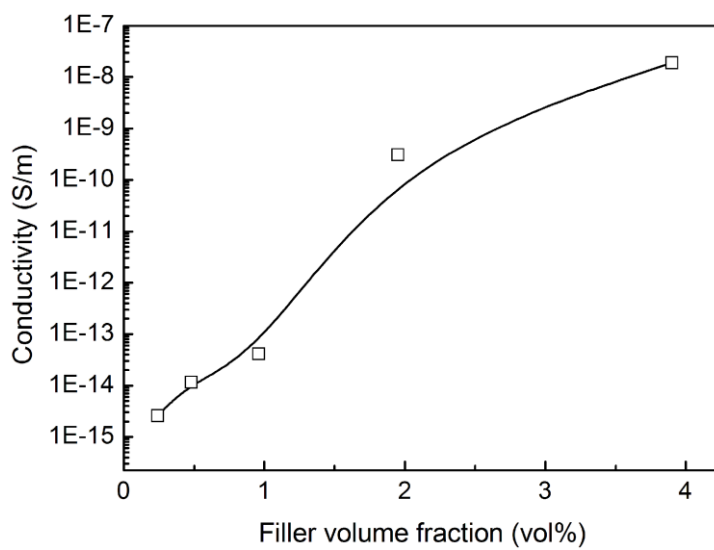

Figure 3S. The electrical conductivities of PS/t-RGO composites prepared by solution blending as a function of filler volume fraction.
